# Supplementary material
Source: PubMed Central journal article supplement (PMC2854211)
Supplement: NIHMS182116-supplement-01.pdf [file NIHMS182116-supplement-01.pdf]

**Table S1 Legend: All significantly regulated ectodermal FGF target genes**

Rank products analysis of microarray slide hybridization signals revealed 28 down-regulated (highlighted in pink) and 64 up-regulated (highlighted in green) genes in *Fgf3* <sup>$\Delta 2/\Delta 2$</sup> ; *Fgf10* <sup>$\Delta 2/\Delta 2$</sup>  placodal ectoderm pools. Column headings are defined in the Table of Contents tab.
